## 1 A single-dose live-attenuated YF17D-vectored SARS-CoV2 vaccine candidate

2 Lorena Sanchez Felipe<sup>1\*</sup>, Thomas Vercruyssen<sup>1,2\*</sup>, Sapna Sharma<sup>1\*</sup>, Ji Ma<sup>1\*</sup>, Viktor  
3 Lemmens<sup>1\*</sup>, Dominique van Looveren<sup>1,2\*</sup>, Mahadesh Prasad Arkalagud Javarappa<sup>1\*</sup>, Robbert  
4 Boudewijns<sup>1\*</sup>, Bert Malengier-Devlies<sup>3</sup>, Suzanne F. Kaptein<sup>1</sup>, Laurens Liesenborghs<sup>1</sup>,  
5 Carolien De Keyzer<sup>1</sup>, Lindsey Bervoets<sup>1</sup>, Madina Rasulova<sup>1,2</sup>, Laura Seldeslachts<sup>7</sup>, Sander  
6 Jansen<sup>1</sup>, Michael Bright Yakass<sup>1,4</sup>, Osbourne Quaye<sup>4</sup>, Li-Hsin Li<sup>1</sup>, Xin Zhang<sup>1</sup>, Sebastiaan ter  
7 Horst<sup>1</sup>, Niraj Mishra<sup>1</sup>, Lotte Coelmont<sup>1</sup>, Christopher Cawthorne<sup>6</sup>, Koen Van Laere<sup>6</sup>, Ghislain  
8 Opendakker<sup>3</sup>, Greetje Van de Velde<sup>7</sup>, Birgit Weynand<sup>5</sup>, Dirk E. Teuwen<sup>1</sup>, Patrick Matthys<sup>3</sup>,  
9 Johan Neyts<sup>1§</sup>, Hendrik Jan Thibaut<sup>1,2§</sup>, Kai Dallmeier<sup>1</sup>

## 10 Authors affiliations

- 11 1. KU Leuven Department of Microbiology, Immunology and Transplantation, Rega  
12 Institute, Virology and Chemotherapy, Molecular Vaccinology & Vaccine Discovery,  
13 BE-3000 Leuven, Belgium
- 14 2. KU Leuven Department of Microbiology, Immunology and Transplantation, Rega  
15 Institute, Translational Platform Virology and Chemotherapy (TPVC), BE-3000  
16 Leuven, Belgium
- 17 3. KU Leuven Department of Microbiology, Immunology and Transplantation, Rega  
18 Institute, Immunity and Inflammation Research Group, Immunobiology Unit, BE-  
19 3000 Leuven, Belgium
- 20 4. West African Centre for Cell Biology of Infectious Pathogens (WACCBIP),  
21 Department of Biochemistry, Cell and Molecular Biology, University of Ghana,  
22 Accra, Ghana
- 23 5. KU Leuven Department of Imaging and Pathology, Translational Cell and Tissue  
24 Research, BE-3000 Leuven, Belgium
- 25 6. KU Leuven Department of Imaging and Pathology, Nuclear Medicine and Molecular  
26 Imaging, BE-3000 Leuven, Belgium
- 27 7. KU Leuven Department of Imaging and Pathology, Biomedical MRI and MoSAIC,  
28 BE-3000 Leuven, Belgium

29 \*Equal contribution; § co-senior authors

30 Correspondence to [kai.dallmeier@kuleuven.be](mailto:kai.dallmeier@kuleuven.be); [hendrikjan.thibaut@kuleuven.be](mailto:hendrikjan.thibaut@kuleuven.be); and  
31 [johan.neyts@kuleuven.be](mailto:johan.neyts@kuleuven.be)

## 32 Keywords

33 COVID-19, SARS-CoV-2, vaccine, YF17D, hamster model

34 **Abstract**

35 The explosively expanding COVID-19 pandemic urges the development of safe, efficacious  
36 and fast-acting vaccines to quench the unrestrained spread of SARS-CoV-2. Several promising  
37 vaccine platforms, developed in recent years, are leveraged for a rapid emergency response to  
38 COVID-19<sup>1</sup>. We employed the live-attenuated yellow fever 17D (YF17D) vaccine as a vector  
39 to express the prefusion form of the SARS-CoV-2 Spike antigen. In mice, the vaccine  
40 candidate, tentatively named YF-S0, induces high levels of SARS-CoV-2 neutralizing  
41 antibodies and a favorable Th1 cell-mediated immune response. In a stringent hamster SARS-  
42 CoV-2 challenge model<sup>2</sup>, vaccine candidate YF-S0 prevents infection with SARS-CoV-2.  
43 Moreover, a single dose confers protection from lung disease in most vaccinated animals even  
44 within 10 days. These results warrant further development of YF-S0 as a potent SARS-CoV-2  
45 vaccine candidate.

46

## 47 **Vaccine design and rationale**

48 Protective immunity against SARS-CoV-2 and other coronaviruses is believed to depend on  
49 neutralizing antibodies (nAbs) targeting the viral Spike (S) protein <sup>3,4</sup>. In particular, nAbs  
50 specific for the N-terminal S1 domain containing the Angiotensin Converting Enzyme 2  
51 (ACE2) receptor binding domain (RBD) interfere with and have been shown to prevent viral  
52 infection in several animal models<sup>5,6</sup>.

53 The live-attenuated YF17D vaccine is known for its outstanding potency to rapidly induce  
54 broad multi-functional innate, humoral and cell-mediated immunity (CMI) responses that may  
55 result in life-long protection following a single vaccine dose in nearly all vaccinees <sup>7,8</sup>. These  
56 favorable characteristics of the YF17D vaccine translate also to vectored vaccines based on the  
57 YF17D backbone <sup>9</sup>. YF17D is used as viral vector in two licensed human vaccines [Imojev<sup>®</sup>  
58 against Japanese encephalitis virus (JEV) and Dengvaxia<sup>®</sup> against dengue virus (DENV)]. For  
59 these two vaccines, genes encoding the YF17D surface antigens prM/E, have been swapped  
60 with those of JEV or DENV, respectively. Potent Zika virus vaccines based on this ChimeriVax  
61 approach are in preclinical development <sup>10</sup>.

62 YF17D is a small (+)-ss RNA live-attenuated virus with a limited vector capacity, but it has  
63 been shown to tolerate insertion of foreign antigens at two main sites in the viral polyprotein <sup>11</sup>.  
64 Importantly, an insertion of foreign sequences is constrained by (i) the complex topology and  
65 post-translational processing of the YF17D polyprotein; and, (ii) the need to express the antigen  
66 of interest in an immunogenic, likely native, fold, to yield a potent recombinant vaccine.

67 Using an advanced reverse genetics system for the generation of recombinant flaviviruses<sup>12,13</sup>,  
68 a panel of YF17D-based COVID-19 vaccine candidates (YF-S) was designed. These express  
69 codon-optimized versions of the S protein [either in its native cleavable S1/2, or non-cleavable  
70 prefusion S0 conformation or its S1 subdomain] of the prototypic SARS-CoV-2 Wuhan-Hu-1

71 strain (GenBank: MN908947.3), as in-frame fusion within the YF17D-E/NS1 intergenic region  
72 (YF-S1/2, YF-S0 and YF-S1) (Figure 1A, Figure S1). As outlined below, variant YF-S0 was  
73 finally selected as lead vaccine candidate based on its superior immunogenicity, efficacy and  
74 favorable safety profile.

75 Infectious live-attenuated YF-S viruses were rescued by plasmid transfection into baby hamster  
76 kidney (BHK-21) cells. Transfected cells presented with a virus-induced cytopathic effect;  
77 infectious virus progeny was recovered from the supernatant and further characterized. Each  
78 construct results in a unique plaque phenotype, smaller than that of the parental YF17D (Figure  
79 1B), in line with some replicative trade-off posed by the inserted foreign sequences. S or S1 as  
80 well as YF17D antigens were readily visualized by double staining of YF-S infected cells with  
81 SARS-CoV-2 Spike and YF17D-specific antibodies (Figure 1C). The expression of S or S1 by  
82 the panel of YF-S variants was confirmed by immunoblotting of lysates of freshly infected  
83 cells. Treatment with PNGase F allowed to demonstrate a proper glycosylation pattern (Figure  
84 1D).

85 In line with a smaller plaque phenotype, intracranial (i.c.) inoculation of YF17D or the YF-S  
86 variants in suckling mice confirmed the attenuation of the different YF-S as compared to the  
87 empty vector YF17D (Figure 2A and B and Figure S2). Mouse pups inoculated i.c. with 100  
88 plaque forming units (PFU) of the parental YF17D stopped growing (Figure S2A) and  
89 succumbed to infection within seven days (median day of euthanasia; MDE) (Figure 2A),  
90 whereas pups inoculated with the YF-S variants continued to grow. From the group inoculated  
91 with YF-S0 only half needed to be euthanized (MDE 17,5 days). For the YF-S1/2 and YF-S1  
92 groups MDE was 12 and 10 days respectively; thus in particular YF-S0 has a markedly reduced  
93 neurovirulence. Likewise, YF-S0 is also highly attenuated in type I and II interferon receptor  
94 deficient AG129 mice, that are highly susceptible to (a neurotropic) YF17D infection<sup>13,14</sup>.

95 Whereas 1 PFU of YF17D resulted in neuro-invasion requiring euthanasia of all mice (MDE  
96 16 days) (Figure 2B), a 1000-fold higher inoculum of YF-S0 did not result in any disease  
97 (Figure S2C) and only 1 in 12 animals that received a 10,000 higher inoculum needed to be  
98 euthanized (Figure 2B). In summary, a set of transgenic replication-competent YF17D variants  
99 (YF-S) was generated that express different forms of the SARS-CoV-2 S antigen and that are  
100 highly attenuated in mice in terms of neurovirulence and neurotropism as compared to YF17D.

101

### 102 **Immunogenicity and protection against SARS-CoV-2 infection and COVID-19-like** 103 **disease in a stringent hamster model.**

104 To assess the potency of the various vaccine constructs, a stringent hamster challenge model  
105 was developed<sup>2</sup>. Animals were vaccinated at day 0 with  $10^3$  PFU (i.p. route) of the different  
106 constructs or the negative controls and were boosted 7 days later with the same dose (Figure  
107 3A). At day 21 post-vaccination, all hamsters vaccinated with YF-S1/2 and YF-S0 (n=12 from  
108 two independent experiments) had seroconverted to high levels of S-specific IgG and virus  
109 nAbs (Figure 3B,C; see Figure S3 for benchmarking of SARS-CoV-2 serum neutralization test,  
110 SNT). For YF-S1/2  $\log_{10}$  geometric mean titers (GMT) for IgG and nAbs were 3.2 (95% CI,  
111 2.9-3.5) and 1.4 (95% CI, 1.1-1.9) respectively, while in the case of YF-S0 GMT values for  
112 IgG and nAbs of 3.5 (95% CI, 3.3-3.8) and 2.2 (95% CI, 1.9-2.6) were measured, with rapid  
113 seroconversion kinetics (50% seroconversion rate < 2 weeks; Figure 3D). By contrast, only 1  
114 out of 12 hamsters that had received YF-S1 seroconverted and this with a low level of nAbs.  
115 This indicates the need for a full-length S antigen to elicit an adequate humoral immune  
116 response.

117 Next, vaccinated hamsters were challenged intranasally (either at day 23 or day 28 post  
118 vaccination) with  $2 \times 10^5$  PFU of SARS-CoV-2. At day 4 post-infection, high viral loads were

119 detected in lungs of sham-vaccinated controls and animals vaccinated with YF17D as matched  
120 placebo (Figure 4A, B). Infection was characterized by a severe lung pathology with multifocal  
121 necrotizing bronchiolitis, leukocyte infiltration and edema, resembling findings in patients with  
122 severe COVID-19 bronchopneumonia (Figure 4A specimen pictures and 4B radar plot;  
123 Supplementary- histogram). By contrast, hamsters vaccinated with YF-S0 were protected  
124 against this aggressive challenge (Figure 3E-F). As compared to sham-vaccinated controls, YF-  
125 S0 vaccinated animals had a median reduction of 5 log<sub>10</sub> (IQR, 4.5-5.4) in viral RNA loads (p  
126 <0.0001; Figure 3D), and of 5.3 log<sub>10</sub> (IQR, 3.9-6.3) for infectious SARS-CoV-2 virus in the  
127 lungs (p <0.0001; Figure 3E). Moreover, infectious virus was no longer detectable in 10 of 12  
128 hamsters (two independent experiments), and viral RNA was reduced to non-quantifiable levels  
129 in their lungs. Residual RNA measured in 2 out of 12 animals may equally well represent  
130 residues of the high-titer inoculum as observed in non-human primate models<sup>15-18</sup>. Vaccination  
131 with YF-S0 (two doses of 10<sup>3</sup> PFU) also efficiently prevented systemic viral dissemination; in  
132 most animals, no or only very low levels of viral RNA were detectable in spleen, liver, kidney  
133 and heart four days after infection (Figure S4A). Similarly and in full support, a slightly  
134 different dose and schedule used for vaccination (5 x 10<sup>3</sup> PFU of YF-S0 at day 0 and 7  
135 respectively) resulted in all vaccinated hamsters (n=7) in respectively a 6 log<sub>10</sub> (IQR, 4.6-6.6)  
136 and 5.7 log<sub>10</sub> (IQR, 5.7-6.6) reduction of viral RNA and infectious virus titers as compared to  
137 sham (Figure S5). Finally, vaccination with YF-S0 may induce saturating levels of nAbs  
138 thereby conferring sterilizing immunity, as demonstrated by the fact that in about half of the  
139 YF-S0 vaccinated hamsters no anamnestic antibody response was observed following challenge  
140 (Figure 3G and S4B-D (paired nAb analysis)). By contrast, in hamsters vaccinated with the  
141 second-best vaccine candidate YF-S1/2, nAb levels further increased following SARS-CoV-2  
142 infection (in 11 out of 12 animals) whereby a plateau was only approached after challenge.

143 The lungs of YF-S0 vaccinated animals remained normal, or near to normal with no more signs  
144 of bronchopneumonia which is markedly different to sham-vaccinated animals (n=12 from two  
145 independent experiments; Figure 4). The specific disease scores and biomarkers quantified<sup>2</sup>  
146 included (i) a reduction or lack of detectable lung pathology as observed by histological  
147 inspection (Figure 4A,B, Figure S6A); and, (ii) a significant improvement of the individual lung  
148 scores ( $p = 0.002$ ) (Figure 4C, Figure S6B) and respiratory capacity (*i.e.\** 32% less of lung  
149 volume obstructed;  $p = 0.0323$ ; Figure 4D) in YF-S0 vaccinated animals as derived by micro-  
150 computed tomography (micro-CT) of the chest. In addition, immunization with YF-S0 resulted  
151 in an almost complete, in most cases full, normalization of the expression of cytokines, *e.g.*, IL-  
152 6, IL-10, or IFN- $\gamma$  in the lung, linked to disease exacerbation in COVID-19 (Figure 4E,F and  
153 Figure S7)<sup>19-21</sup>. Even the most sensitive markers of viral infection, such as the induction of  
154 antiviral Type III interferons (IFN- $\lambda$ )<sup>22</sup>, or the expression of IFN-stimulated genes (ISG) such  
155 as MX2 and IP-10 in YF-S0 vaccinated animals showed no elevation as compared to levels in  
156 the lungs of untreated healthy controls (Figure 4F and Figure S7).

157 Overall, YF-S0 that expresses the non-cleavable S variant outcompeted construct YF-S1/2  
158 expressing the cleavable version of S. This argues for the stabilized prefusion form of S serving  
159 as a relevant protective antigen for SARS-CoV-2. Moreover, in line with its failure to induce  
160 nAbs (Figure 3B), construct YF-S1 expressing solely the hACE2 receptor-binding S1 domain  
161 (Figure 1D) did not confer any protection against SARS-CoV-2 challenge in hamsters (Figure  
162 3E, F and Figure 4).

163

164 **Immunogenicity, in particular a favorable Th1 polarization of cell-mediated immunity in**  
165 **mice**

166 Since there are very few tools available to study CMI in hamsters, humoral and CMI responses  
167 elicited by the different YF-S constructs were studied in parallel in mice. Since YF17D does  
168 not readily replicate in wild-type mice<sup>23,24</sup>, *Ifnar*<sup>-/-</sup> mice that are deficient in Type I interferon  
169 signaling and that are hence susceptible to vaccination with YF17D, were employed<sup>10,24,25</sup>.

170 Mice were vaccinated with 400 PFU (of either of the YF-S variants, YF17D or sham) at day 0  
171 and were boosted with the same dose 7 days later (Figure 5A). At day 21 all YF-S1/2 and YF-  
172 S0 vaccinated mice (n>9 in three independent experiments) had seroconverted to high levels of  
173 S-specific IgG and nAbs with log<sub>10</sub> GMT of 3.5 (95% CI, 3.1-3.9 ) for IgG and 2.2 (95% CI,  
174 1.7-2.7) for nAbs in the case of YF-S1/2, or 4.0 (95% CI, 3.7-4.2) for IgG and 3.0 (95% CI,  
175 2.8-3.1) for nAbs in the case of YF-S0 (Figure 5B,C). Importantly, seroconversion to S-specific  
176 IgG was detectable as early as 7 days after the first immunization (Figure 5D). Isotyping of IgG  
177 revealed an excess of IgG2b/c over IgG1 indicating a dominant pro-inflammatory and hence  
178 antiviral (Th1) polarization of the immune response (Figure 5E) which is considered important  
179 for vaccine-induced protection against SARS-CoV-2<sup>26-28</sup>. Alike in hamsters, YF-S1 failed to  
180 induce SARS-CoV-2 nAbs (Figure 5B,C). However, high levels of YF nAbs were conjointly  
181 induced by all constructs confirming a consistent immunization (Figure S8).

182 To assess SARS-CoV-2-specific CMI responses that play a pivotal role for the shaping and  
183 longevity of vaccine-induced immunity as well as in the pathogenesis of COVID-19<sup>29,30</sup>,  
184 splenocytes from vaccinated mice were incubated with a tiled peptide library spanning the  
185 entire S protein as recall antigen. In general, vaccination with any of the YF-S variants resulted  
186 in marked S-specific T-cell responses with a favorable Th1-polarization as detected by IFN- $\gamma$   
187 ELISpot (Figure 6A), further supported by an upregulation of T-bet (*TBX21*), in particular in  
188 cells isolated from YF-S0 vaccinated mice (p = 0.0198, n = 5). This CMI profile was balanced  
189 by a concomitant elevation of GATA-3 levels (*GATA3*; driving Th2; p = 0.016), but no marked  
190 overexpression of ROR $\gamma$ t (*RORC*; Th17) or FoxP3 (*FOXP3*; Treg) (Figure 6B). Intriguingly,



191 in stark contrast to its failure to induce nAbs in mice (Figure 5A,C), or protection in hamsters  
192 (Figure 2 and 3), YF-S1 vaccinated animals had a greater number of S-specific splenocytes ( $p$   
193  $< 0.0001$ ,  $n = 7$ ) than those vaccinated with YF-S1/2 or YF-S0 (Figure 6A). Thus, even a  
194 vigorous CMI may not be sufficient for vaccine efficacy. A more in-depth profiling of the T-  
195 cell compartment by means of intracellular cytokine staining (ICS) and flow cytometry  
196 confirmed the presence of S-specific IFN- $\gamma$  and TNF- $\alpha$  expressing CD8<sup>+</sup> T-lymphocytes, and  
197 of IFN- $\gamma$  expressing CD4<sup>+</sup> (Figure 6E) and  $\gamma/\delta$  T lymphocytes (Figure 6F), in particular in YF-  
198 S0 immunized animals. A specific and pronounced elevation of other markers such as IL-4  
199 (Th2 polarization), IL-17A (Th17), or FoxP3 (regulatory T-cells) was not observed for YF-S1/2  
200 or YF-S0. This phenotype is supported by t-SNE plot analysis of the respective T-cell  
201 populations in YF-S1/2 and YF-S0 vaccinated mice (Figure 6G and S8 tSNE) showing an  
202 increased percentage of IFN- $\gamma$  expressing cells. It further revealed, firstly, a similar composition  
203 of either CD4<sup>+</sup> cell sets, comprising an equally balanced mixture of Th1 (IFN- $\gamma$ <sup>+</sup> and/or TNF-  
204  $\alpha$ <sup>+</sup>) and Th2 (IL-4<sup>+</sup>) cells, and possibly a slight raise in Th17 cells in the case of the YF-S0  
205 vaccinated animals. Likewise, secondly, for both constructs the CD8<sup>+</sup> T-lymphocyte population  
206 was dominated by IFN- $\gamma$  or TNF- $\alpha$  expressing cells, in line with the matched transcriptional  
207 profiles (Figure 6B). Of note, though similar in numbers, both vaccines YF-S0 and YF-S1/2  
208 showed a distinguished (non-overlapping) profile regarding the respective CD8<sup>+</sup> T lymphocyte  
209 populations expressing IFN- $\gamma$ . In fact, YF-S0 tended to induce S-specific CD8<sup>+</sup> T-cells with a  
210 stronger expression of IFN- $\gamma$  (Figure 6G and S8). In summary, YF-S0 induces a vigorous and  
211 balanced CMI response in mice with a favorable Th1 polarization, dominated by SARS-CoV-  
212 2 specific CD8<sup>+</sup> T-cells expressing high levels of IFN- $\gamma$  when encountering the SARS-CoV-2  
213 S antigen.

214

215 **Protection and short time to benefit after single-dose vaccination**

216 Finally, vaccination of hamsters using a single-dose of YF-S0 induced high levels of nAbs and  
217 bAbs (Figure 7B and 7C) in a dose- and time-dependent manner. Furthermore, it appears a  
218 single  $10^4$  PFU dose of YF-S0 yielded higher levels of nAbs ( $\log_{10}$  GMT 2.8; 95% CI: 2.5-3.2)  
219 at 21 days post-vaccination compared to the antibody levels in a prime-boost vaccination with  
220 two doses of  $10^3$  PFU ( $\log_{10}$  GMT 2.2; 95% CI: 1.9-2.6) ( $p = 0.039$ , two tailed Mann-Whitney  
221 test) (Figure 3B). Also, this single-dose regimen resulted in efficient and full protection against  
222 SARS-CoV-2 challenge, assessed by absence of infectious virus in the lungs in 8 out of 8  
223 animals (Figure 7E). It should be noted that viral RNA at quantifiable levels was present in only  
224 1 out of 8 animals (Figure 7D). In addition, protective immunity was mounted rapidly. Already  
225 10 days after vaccination, 5 out of 8 animals receiving  $10^4$  PFU of YF-S0 were protected against  
226 stringent infection challenge (Figure 7D and 7E).

227

## 228 Discussion

229 Vaccines against SARS-CoV-2 need to be safe and result rapidly, ideally after one single dose,  
230 in long-lasting protective immunity. Different SARS-CoV-2 vaccine candidates are being  
231 developed, and several are vector-based. We report encouraging results of YF17D-vectored  
232 SARS-CoV-2 vaccine candidates. The post-fusion (S1/2), pre-fusion (S0) as well as the RBD  
233 S1 domain (S1) of the SARS-CoV-2 Spike protein were inserted in the YF17D backbone to  
234 yield the YF-S1/2, YF-S0 and YF-S1, respectively (Figure S1). The YF-S0 vaccine candidate,  
235 in particular, resulted in a robust humoral immune response in both, mice and Syrian hamsters.  
236 Since SARS-CoV-2 replicates massively in the lungs of infected Syrian hamsters and results in  
237 major lung pathology<sup>2,31-33</sup> we selected this model to assess the potency of these three vaccine  
238 candidates. YF-S0 resulted in efficient protection against stringent SARS-CoV-2 challenge,  
239 comparable, if not more vigorous, to other vaccine candidates in non-human primate  
240 models<sup>16,17,34</sup>. In about 40% of the YF-S0 vaccinated animals no increase in nAb levels (> 2x)  
241 following SARS-CoV-2 challenge was observed, suggestive for sterilizing immunity (no  
242 anamnestic response). In experiments in which animals were challenged three weeks after  
243 single 10<sup>4</sup> PFU dose vaccination, no infectious virus was detected in the lungs. Considering the  
244 severity of the model, it is remarkable, that in several animals that were challenged with SARS-  
245 CoV-2 already 10 days after vaccination no infectious virus could be recovered from the lungs.  
246 Reduction of viral replication mitigated lung pathology in infected animals with a concomitant  
247 normalization of biomarkers associated with infection and disease (Figure 4 and S6). Likewise,  
248 in lungs of vaccinated and subsequently challenged hamsters no elevation of cytokines, such as  
249 IL-6, was noted (Figure 4F).

250 Moreover, YF-S0 showed in two mice models a favorable safety profile as compared to the  
251 parental YF17D vector (Figure 2A and B). This is of importance as YF17D vaccine is contra-

252 indicated in elderly and persons with underlying medical conditions. These preliminary, though  
253 encouraging, data suggest that YF-S0 might also be safe in those persons most vulnerable to  
254 COVID-19.

255 In addition, cell-mediated immunity (CMI) studied in mice revealed that YF-S0, besides  
256 efficiently inducing high titers of nAbs, favors a Th1 response. Such a Th1 polarization is  
257 considered relevant in light of a disease enhancement supposedly linked to a skewed Th2  
258 immune<sup>29</sup> or antibody-dependent enhancement (ADE)<sup>35</sup>. ADE may occur when virus-specific  
259 antibodies promote virus infection via various Fc $\gamma$  receptor-mediated mechanisms, as suggested  
260 for an inactivated RSV post-fusion vaccine candidate<sup>36</sup>. A Th2 polarization may cause an  
261 induction and dysregulation of alternatively activated 'wound-healing'  
262 monocytes/macrophages<sup>26-28,37</sup> resulting in an overshooting inflammatory response (cytokine  
263 storm) thus leading to acute lung injury (ALI). No indication of such a disease enhancement  
264 was observed in our models.

265 In conclusion, YF-S0 confers vigorous protective immunity against SARS-CoV-2 infection.  
266 Remarkably, this immunity can be achieved within 10 days following a single dose vaccination.  
267 In light of the threat SARS-CoV-2 will remain endemic with spikes of re-infection, as a  
268 recurring plague, vaccines with this profile may be ideally suited for population-wide  
269 immunization programs.

270

## 271 **Methods**

### 272 **Cells and viruses**

273 BHK-21J (baby hamster kidney fibroblasts) cells<sup>37</sup> were maintained in Minimum Essential  
274 Medium (Gibco), Vero E6 (African green monkey kidney, ATCC CRL-1586) and HEK-293T  
275 (human embryonic kidney cells) cells were maintained in Dulbecco's Modified Eagle Medium  
276 (Gibco). All media were supplemented with 10% fetal bovine serum (Hyclone), 2 mM L-  
277 glutamine (Gibco), 1% sodium bicarbonate (Gibco). BSR-T7/5 (T7 RNA polymerase  
278 expressing BHK-21)<sup>38</sup> cells were kept in DMEM supplemented with 0.5 mg/ml geneticin  
279 (Gibco).

280 For all challenge experiments in hamsters, SARS-CoV-2 strain BetaCov/Belgium/GHB-  
281 03021/2020 (EPI ISL 407976|2020-02-03) was used from passage P4 grown on Vero E6 cells  
282 as described<sup>2</sup>. YF17D (Stamaril<sup>®</sup>, Sanofi-Pasteur) was passaged twice in Vero E6 cells before  
283 use.

### 284 **Vaccine design and construction**

285 Different vaccine constructs were generated using an infectious cDNA clone of YF17D (in an  
286 inducible BAC expression vector pShuttle-YF17D, patent number WO2014174078 A1)<sup>10,12,39</sup>.  
287 A panel of several SARS-CoV-2 vaccine candidates was engineered by inserting a codon  
288 optimized sequence of either the SARS-CoV-2 Spike protein (S) (GenBank: MN908947.3) or  
289 variants thereof into the full-length genome of YF17D (GenBank: X03700) as translational in-  
290 frame fusion within the YF-E/NS1 intergenic region<sup>11,40</sup> (Figure S1). The variants generated  
291 contained (i) either the S protein sequence from amino acid (aa) 14-1273, expressing S in its  
292 post-fusion and/or prefusion conformation (YF-S1/2 and YF-S0, respectively), or (ii) its  
293 subunit-S1 (aa 14-722; YF-S1). To ensure a proper YF topology and correct expression of

294 different S antigens in the YF backbone, transmembrane domains derived from WNV were  
295 inserted.

296 The SARS2-CoV-2 vaccine candidates were cloned by combining the S cDNA (obtained after  
297 PCR on overlapping synthetic cDNA fragments; IDT) by a NEB Builder Cloning kit (New  
298 England Biolabs) into the pShuttle-YF17D backbone. NEB Builder reaction mixtures were  
299 transformed into *E.coli* EPI300 cells (Lucigen) and successful integration of the S protein  
300 cDNA was confirmed by Sanger sequencing. Recombinant plasmids were purified by column  
301 chromatography (Nucleobond Maxi Kit, Machery-Nagel) after growth over night, followed by  
302 an additional amplification of the BAC vector for six hours by addition of 2 mM L-arabinose  
303 as described<sup>10</sup>.

304 Infectious vaccine viruses were generated from plasmid constructs by transfection into BHK-  
305 21J cells using standard protocols (TransIT-LT1, Mirus Bio). The supernatant was harvested  
306 four days post-transfection when most of the cells showed signs of CPE. Infectious virus titers  
307 (PFU/ml) were determined by a plaque assay on BHK-21J cells as previously described<sup>10,14</sup>.  
308 The presence of inserted sequences in generated vaccine virus stocks was confirmed by RNA  
309 extraction (Direct-zol RNA kit, Zymo Research) followed by RT-PCR (qScript XLT, Quanta)  
310 and Sanger sequencing, and by immunoblotting of freshly infected cells (see *infra*).

### 311 **Immunofluorescent staining**

312 *In vitro* antigen expression of different vaccine candidates was verified by immunofluorescent  
313 staining as described previously by Kum et al. 2018. Briefly, BHK-21J cells were infected with  
314 100 PFU of the different YF-S vaccine candidates. Infected cells were stained three days post-  
315 infection (3dpi). For detection of YF antigens polyclonal mouse anti-YF17D antiserum was  
316 used. For detection of SARS-CoV-2 Spike antigen rabbit SARS-CoV Spike S1 antibody

317 (40150-RP01, Sino Biological) and rabbit SARS-CoV Spike primary antibody (40150-T62-  
318 COV2, Sino Biological) was used. Secondary antibodies were goat anti-mouse Alexa Fluor-  
319 594 and goat anti-rabbit Alexa Fluor-594 (Life Technologies). Cells were counterstained with  
320 DAPI (Sigma). All confocal fluorescent images were acquired using the same settings on a  
321 Leica TCS SP5 confocal microscope, employing a HCX PL APO 63x (NA 1.2) water  
322 immersion objective.

### 323 **Immunoblot analysis (Simple Western)**

324 Infected BHK21-J cells were harvested and washed once with ice cold phosphate buffered  
325 saline, and lysed in radioimmunoprecipitation assay buffer (Thermo Fisher Scientific)  
326 containing 1x protease inhibitor and phosphatase inhibitor cocktail (Thermo Fisher Scientific).  
327 After centrifugation at 15,000 rpm at 4 °C for 10 minutes, protein concentrations in the cleared  
328 lysates were measured using BCA (Thermo Fisher Scientific). Immunoblot analysis was  
329 performed by a Simple Western size-based protein assay (Protein Simple) following  
330 manufactures instructions. Briefly, after loading of 400 ng of total protein onto each capillary,  
331 specific S protein levels were identified using specific primary antibodies (NB100-56578,  
332 Novus Biologicals and 40150-T62-CoV2, Sino Biological Inc.), and HRP conjugated  
333 secondary antibody (Protein Simple). Chemiluminescence signals were analyzed using  
334 Compass software (Protein Simple). To evaluate the removal of N-linked oligosaccharides from  
335 the glycoprotein, protein extracts were treated with PNGase F according to manufactures  
336 instructions (NEB).

### 337 **Animals**

338 Wild-type Syrian hamsters (*Mesocricetus auratus*) and BALB/c mice and pups were purchased  
339 from Janvier Laboratories, Le Genest-Saint-Isle, France. *Ifnar1*<sup>-/-</sup> 41 and AG129<sup>42</sup> were bred in-

340 house. Six- to ten-weeks-old female mice and wild-type hamsters were used throughout the  
341 study.

## 342 **Animal Experiments**

343 Animals were housed in couples (hamsters) or per five (mice) in individually ventilated isolator  
344 cages (IsoCage N – Biocontainment System, Tecniplast) with access to food and water *ad*  
345 *libitum*, and cage enrichment (cotton and cardboard play tunnels for mice, wood block for  
346 hamsters). Housing conditions and experimental procedures were approved by the Ethical  
347 Committee of KU Leuven (license P015-2020), following Institutional Guidelines approved by  
348 the Federation of European Laboratory Animal Science Associations (FELASA). Animals were  
349 euthanized by 100  $\mu$ l (mice) or 500  $\mu$ l (hamsters) of intraperitoneally administered Dolethal  
350 (200 mg/ml sodium pentobarbital, Vétquinol SA).

## 351 **Immunization and infection of hamsters.**

352 Hamsters were intraperitoneally (i.p) vaccinated with the indicated amount of PFUs of the  
353 different vaccine constructs using a prime and boost regimen (at day 0 and 7). As a control, two  
354 groups were vaccinated at day 0 and day 7 with either  $10^3$  PFU of YF17D or with MEM medium  
355 containing 2% FBS (sham). All animals were bled at day 21 to analyze serum for binding and  
356 neutralizing antibodies against SARS-CoV-2. At the indicated time after vaccination and prior  
357 to challenge, hamsters were anesthetized by intraperitoneal injection of a xylazine (16 mg/kg,  
358 XYL-M<sup>®</sup>, V.M.D.), ketamine (40 mg/kg, Nimatek<sup>®</sup>, EuroVet) and atropine (0.2 mg/kg,  
359 Sterop<sup>®</sup>) solution. Each animal was inoculated intranasally by gently adding 50  $\mu$ l droplets of  
360 virus stock containing  $2 \times 10^5$  TCID<sub>50</sub> of SARS-CoV-2 on both nostrils. Animals were  
361 monitored daily for signs of disease (lethargy, heavy breathing or ruffled fur). Four days after  
362 challenge, all animals were euthanized to collect end sera and lung tissue in RNA later, MEM



363 or formalin for gene-expression profiling, virus titration or histopathological analysis,  
364 respectively.

### 365 **Immunization of mice.**

366 *Ifnar1*<sup>-/-</sup> mice were i.p. vaccinated with different vaccine constructs by using a prime and boost  
367 of each 4 x 10<sup>2</sup> PFU (at day 0 and 7). As a control, two groups were vaccinated (at day 0 and  
368 7) with either YF17D or sham. All mice were bled weekly and serum was separated by  
369 centrifugation for indirect immunofluorescence assay (IIFA) and serum neutralization test  
370 (SNT). Three weeks post first-vaccination, mice were euthanized, spleens were harvested for  
371 ELISpot, transcription factor analysis by qPCR and intracellular cytokine staining (ICS).

### 372 **SARS-CoV-2 RT-qPCR**

373 The presence of infectious SARS-CoV-2 particles in lung homogenates was quantified by  
374 qPCR<sup>2</sup>. Briefly, for quantification of viral RNA levels and gene expression after challenge,  
375 RNA was extracted from homogenized organs using the NucleoSpin™ Kit Plus (Macherey-  
376 Nagel), following the manufacturer's instructions. Reactions were performed using the iTaq™  
377 Universal Probes One-Step RT-qPCR kit (BioRad), with primers and probes (Integrated DNA  
378 Technologies) listed in Supplementary Table S1. The relative RNA fold change was calculated  
379 with the 2<sup>-ΔΔC<sub>q</sub></sup> method<sup>43</sup> using housekeeping gene β-actin for normalization.

### 380 **End-point virus titrations**

381 To quantify infectious SARS-CoV-2 particles, endpoint titrations were performed on confluent  
382 Vero E6 cells in 96-well plates. Lung tissues were homogenized using bead disruption  
383 (Precellys®) in 250 μL minimal essential medium and centrifuged (10,000 rpm, 5 min, 4 °C) to

384 pellet the cell debris. Viral titers were calculated by the Reed and Muench method<sup>44</sup> and  
385 expressed as 50% tissue culture infectious dose (TCID<sub>50</sub>) per mg tissue.

### 386 **Histology**

387 For histological examination, lung tissues were fixed overnight in 4% formaldehyde and  
388 embedded in paraffin. Tissue sections (5 µm) were stained with hematoxylin and eosin and  
389 analyzed blindly for lung damage by an expert pathologist.

### 390 **Micro-computed tomography (CT) and image analysis**

391 To monitor the development of lung pathology after SARS-CoV-2 challenge, hamsters were  
392 imaged using an X-cube micro-computed tomography (CT) scanner (Molecubes) as described  
393 before<sup>2</sup>. Quantification of reconstructed micro-CT data were performed with DataViewer and  
394 CTan software (Bruker Belgium). A semi-quantitative scoring of micro-CT data was performed  
395 as primary outcome measure and imaging-derived biomarkers (non-aerated lung volume) as  
396 secondary measures, as previously described<sup>2,45-48</sup>.

397

### 398 **Neurovirulence in suckling mice and neurotropism in AG129 mice**

399 BALB/c mice pups and AG129 mice were respectively intracranially or i.p. inoculated with the  
400 indicated PFU amount of YF17D and YF-S vaccine constructs and monitored daily for  
401 morbidity and mortality for 21 days post inoculation.

### 402 **Detection of total binding IgG and IgG isotyping by indirect immunofluorescent assay** 403 **(IIFA)**

404 To detect SARS-CoV-2 specific antibodies in hamster and mouse serum, an in-house developed  
405 indirect IFA (IIFA) was used. Using CRISPR/Cas9, a CMV-SARS-CoV-2-Spike-Flag-IRES-  
406 mCherry-P2A-BlastiR cassette was stably integrated into the ROSA26 safe harbor locus of  
407 HEK293T cells<sup>49</sup>. To determine SARS-CoV-2 Spike binding antibody end titers, 1/2 serial  
408 serum dilutions were made in 96-well plates on HEK293T-Spike stable cells and HEK293T wt  
409 cells in parallel. Goat-anti-mouse IgG Alexa Fluor 488 (A11001, Life Technologies), goat-anti-  
410 mouse IgG1, IgG2b and IgG2c Alexa Fluor 488 (respectively 115-545-205, 115-545-207 and  
411 115-545-208 from Jackson ImmunoResearch) were used as secondary antibody. After  
412 counterstaining with DAPI, fluorescence in the blue channel (excitation at 386 nm) and the  
413 green channel (excitation at 485 nm) was measured with a Cell Insight CX5 High Content  
414 Screening platform (Thermo Fischer Scientific). Specific SARS2-CoV-2 Spike staining is  
415 characterized by cytoplasmic (ER) enrichment in the green channel. To quantify this specific  
416 SARS-CoV-2 Spike staining the difference in cytoplasmic vs. nuclear signal for the HEK293T  
417 wt conditions was subtracted from the difference in cytoplasmic vs. nuclear signal for the  
418 HEK293T SARS-CoV-2 Spike conditions. All positive values were considered as specific  
419 SARS-CoV-2 staining. The IIFA end titer of a sample is defined as the highest dilution that  
420 scored positive this way. Because of the limited volume of serum, IIFA end titers for all  
421 conditions were determined on minipools of two to three samples.

#### 422 **Pseudotyped virus seroneutralization test (SNT)**

423 SARS-CoV-2 VSV pseudotypes were generated as described previously<sup>50-52</sup>. Briefly, HEK-  
424 293T cells were transfected with a pCAGGS-SARS-CoV-2 $\Delta$ 18-Flag expression plasmid  
425 encoding SARS-CoV-2 Spike protein carrying a C-terminal 18 amino acids deletion<sup>53,54</sup>. One  
426 day post-transfection, cells were infected with VSV $\Delta$ G expressing a GFP (green fluorescent  
427 protein) reporter gene (MOI 2) for 2h. The medium was changed with medium containing anti-

428 VSV-G antibody (I1, mouse hybridoma supernatant from CRL-2700; ATCC) to neutralize any  
429 residual VSV-G virus input<sup>55</sup>. 24h later supernatant containing SARS-CoV-2 VSV pseudotypes  
430 was harvested.

431 To quantify SARS-CoV-2 nAbs, serial dilutions of serum samples were incubated for 1 hour at  
432 37 °C with an equal volume of SARS-CoV-2 pseudotyped VSV particles and inoculated on  
433 Vero E6 cells for 18 hours. Neutralizing titers (SNT<sub>50</sub>) for YFV were determined with an in-  
434 house developed fluorescence based assay using a mCherry tagged variant of YF17D virus<sup>10,39</sup>.  
435 To that end, serum dilutions were incubated in 96-well plates with the YF17D-mCherry virus  
436 for 1h at 37 °C after which serum-virus complexes were transferred for 72 h to BHK-21J cells.  
437 The percentage of GFP or mCherry expressing cells was quantified on a Cell Insight CX5/7  
438 High Content Screening platform (Thermo Fischer Scientific) and neutralization IC<sub>50</sub> values  
439 were determined by fitting the serum neutralization dilution curve that is normalized to a virus  
440 (100%) and cell control (0%) in Graphpad Prism (GraphPad Software, Inc.).

#### 441 **SARS-CoV-2 plaque reduction neutralization test (PRNT)**

442 Sera were serially diluted with an equal volume of 70 PFU of SARS-CoV-2 before incubation  
443 at 37 °C for 1h. Serum-virus complexes were added to Vero E6 cell monolayers in 24-well  
444 plates and incubated at 37 °C for 1h. Three days later, overlays were removed and stained with  
445 0.5% crystal violet after fixation with 3.7% PFA. Neutralization titers (PRNT<sub>50</sub>) of the test  
446 serum samples were defined as the reciprocal of the highest test serum dilution resulting in a  
447 plaque reduction of at least 50%.

#### 448 **Antigens for T cell assays**

449 PepMix™ Yellow Fever (NS4B) (JPT-PM-YF-NS4B) and subpool-1 (158 overlapping 15-  
450 mers) of PepMix™ SARS-CoV-2 spike (JPT-PM-WCPV-S-2) were used as recall antigens for  
451 ELISpot and ICS. Diluted Vero E6 cell lysate (50 µg/mL) and a combination of PMA (50  
452 ng/mL) (Sigma-Aldrich) and Ionomycin (250 ng/mL) (Sigma-Aldrich) served as negative and  
453 positive control, respectively.

#### 454 **Intracellular cytokine staining (ICS) and flow cytometry**

455 Fresh mouse splenocytes were incubated with 1.6 µg/mL Yellow Fever NS4B peptide; 1.6  
456 µg/mL Spike peptide subpool-1; PMA (50 ng/mL)/Ionomycin (250 ng/mL) or 50 µg/mL Vero  
457 E6 cell for 18h at 37 °C. After treatment with brefeldin A (Biolegend) for 4h, the splenocytes  
458 were stained for viability with Zombie Aqua™ Fixable Viability Kit (Biolegend) and Fc-  
459 receptors were blocked by the mouse FcR Blocking Reagent (Miltenyi Biotec)(0.5µL/well) for  
460 15 min in the dark at RT. Cells were then stained with extracellular markers BUV395 anti-CD3  
461 (17A2) (BD), BV785 anti-CD4 (GK1.5) (Biolegend), APC/Cyanine7 anti-CD8 (53-6.7)  
462 (Biolegend) and PerCP/Cyanine5.5 anti-TCR  $\gamma/\delta$  (GL3) (Biolegend) in Brilliant Stain Buffer  
463 (BD) before incubation on ice for 25 min. Cells were washed once with PBS and  
464 fixed/permeabilized for 30 min by using the FoxP3 transcription factor buffer kit (Thermo  
465 Fisher Scientific) according to the manufacturer's protocol. Finally, cells were intracellularly  
466 stained with following antibodies: PE anti-IL-4 (11B11), APC anti-IFN- $\gamma$  (XMG1.2),  
467 PE/Dazzle™ 594 anti-TNF- $\alpha$  (MP6-XT22), Alexa Fluor® 488 anti-FOXP3 (MF-14), Brilliant  
468 Violet 421 anti-IL-17A (TC11-18H10.1) (all from Biolegend) and acquired on a BD  
469 LSRFortessa™ X-20 (BD). All measurements were calculated by subtracting from non-  
470 stimulated samples (incubated with non-infected Vero E6 cell lysates) from corresponding  
471 stimulated samples. The gating strategy employed for ICS analysis is depicted in Fig. S9. The  
472 strategy used for comparative expression profiling of vaccine-induced T-cell populations by t-

473 distributed Stochastic Neighbor Embedding (t-SNE) analysis is outlined in Fig. S8. All flow  
474 cytometry data were analysed using FlowJo Version 10.6.2 (LLC)). t-SNE plot was generated  
475 in Flowjo after concatenating spike-specific CD4 and CD8 T cell separately based on gated  
476 splenocyte samples.

#### 477 **ELISpot**

478 ELISpot assays for the detection of IFN- $\gamma$ -secreting mouse splenocytes were performed with  
479 mouse IFN- $\gamma$  kit (ImmunoSpot<sup>®</sup> MIFNG-1M/5, CTL Europe GmbH). IFN- $\gamma$  spots were  
480 visualized by stepwise addition of a biotinylated detection antibody, a streptavidin-enzyme  
481 conjugate and the substrate. Spots were counted using an ImmunoSpot<sup>®</sup> S6 Universal Reader  
482 (CTL Europe GmbH) and normalized by subtracting spots numbers from control samples  
483 (incubated with non-infected Vero E6 cell lysates) from the spot numbers of corresponding  
484 stimulated samples. Negative values were corrected to zero.

#### 485 **qPCR for transcription factor profile.**

486 Spike peptide-stimulated splenocytes split were used for RNA extraction by using the  
487 sNucleoSpin<sup>™</sup> Kit Plus kit (Macherey-Nagel). cDNA was generated by using a high-capacity  
488 cDNA Reverse Transcription Kit (Thermo Fisher Scientific). Real-time PCR was performed  
489 using the TaqMan gene expression assay (Applied Biosystems) on an ABI 7500 fast platform.  
490 Expression levels of TBX21, GATA3, RORC, FOXP3 (all from Integrated DNA Technologies)  
491 were normalized to the expression of GAPDH (IDT). Relative gene expression was assessed  
492 by using the  $2^{-\Delta\Delta Cq}$  method.

#### 493 **Statistical analysis**

494 GraphPad Prism (GraphPad Software, Inc.) was used for all statistical evaluations. The number  
495 of animals and independent experiments that were performed is indicated in the figure legends.  
496 Statistical significance was determined using the non-parametric Mann-Whitney U-test and  
497 Kruskal-Wallis test if not otherwise stated. Values were considered significantly different at P  
498 values of  $\leq 0.05$ .

499

## 500 **Acknowledgements**

501

502 We thank Sarah Debayeve, Elke Maas, Jasper Rymenants, Tina Van Buyten and Caroline  
503 Collard (Laboratory of Virology, Rega) as well as Kathleen Van den Eynde, Eef Allegaert,  
504 Sarah Cumps and Wilfried Versin (Histology) for their outstanding technical support. We  
505 thank Catherina Coun, Jasmine Paulissen, Céline Sablon and Nathalie Thys (TVPC-Rega) for  
506 their excellent technical assistance for generating all serology data. We thank Jens Wouters  
507 and Dr. Johan Nuyts (MoSAIC and Nuclear Medicine and Molecular Imaging, KU Leuven)  
508 for help with micro-CT image analysis and support with imaging file processing. We thank  
509 Nele Berghmans, Sofie Knoops, Thy Pham and Helena Crijns from the Rega Immunology  
510 group (KU Leuven) and Nicolas Ongenae from ViroVet NV (Leuven) for help with hamster  
511 husbandry and bleeding.

512 We thank Julie Verducruysse, Cédric Vansalen and Dr. Nesya Goris (ViroVet NV, Leuven,  
513 Belgium) for help with large scale plasmid production. We thank Prof. Jelle Matthijssens,  
514 Dr. Ward Deboutte and Lila Close for next-generation sequencing analysis of vaccine virus  
515 stocks. We thank Prof. Dirk Daelemans for access and Winston Chiu (Caps-It, Rega) for  
516 technical assistance with the High Content Screening Platform. This list of selfless people

517 providing generous help during these exceptional times may not be complete. The  
518 corresponding authors may like to excuse for any oversight and thus omission.

519

520 For sharing materials, reagents and protocols we thank Prof. Michael A. Whitt (University of  
521 Tennessee Health Science Center Memphis, TN, USA) for providing plasmids to rescue VSV-  
522 dG-GFP pseudoviruses; Dr. Hannah Kleine-Weber, Dr. Markus Hoffmann and Prof. Stefan  
523 Pöhlmann (DPZ, Göttingen, Germany) for sharing L1-Hybridoma supernatants and protocols  
524 for the generation VSV-pseudovirions; Prof. Berend Jan Bosch and Dr. Wentao Li  
525 (University of Utrecht, The Netherlands) for sharing SARS-CoV-S expression plasmids; Prof.  
526 Ian Goodfellow (University of Cambridge, UK) for providing BSR-T7 cells; Els Brouwers  
527 (PharmAbs, KU Leuven) for assistance in culturing hybridoma cells; Prof. Peter Bredenbeek  
528 (LUMC, The Netherland) for providing BHK-21J and Vero E6 cells. *Ifnar1<sup>-/-</sup>* mouse breeding  
529 couples were a generous gift of Dr. Claude Libert, (IRC/VIB, University of Ghent, Belgium).

530

### 531 **Funding**

532 This project has received funding from the European Union's Horizon 2020 research and  
533 innovation program under grant agreements No 101003627 (SCORE project) and No 733176  
534 (RABYD-VAX consortium), funding from Bill and Melinda Gates Foundation under grant  
535 agreement INV-00636, and was supported by the Research Foundation Flanders (FWO) under  
536 the Excellence of Science (EOS) program (VirEOS project 30981113), the FWO Hercules  
537 Foundation (Caps-It infrastructure), and the KU Leuven Rega Foundation. This project  
538 received funding from the Research Foundation – Flanders (FWO) under Project No  
539 G0G4820N and the KU Leuven/UZ Leuven Covid-19 Fund under the COVAX-PREC  
540 project. J.M. and X.Z. were supported by grants from the China Scholarship Council (CSC).



541 C.C. was supported by the FWO (FWO 1001719N). G.V.V. acknowledges grant support from  
542 KU Leuven Internal Funds (C24/17/061) and K.D. grant support from KU Leuven Internal  
543 Funds (C3/19/057 Lab of Excellence). G.O. is supported by funding from KU Leuven  
544 (C16/17/010) and from FWO-Vlaanderen. We appreciate the in-kind contribution of UCB  
545 Pharma, Brussels.

546 Finally, we wish to express our gratitude to everyone who has put their weight behind the  
547 research. Whether they donated money, organized fundraising campaigns or helped spread the  
548 word. Every form of support has made the difference. Thanks to the impulse we have  
549 received through the COVID-19 Fund, we were strengthened in our effort to develop a  
550 vaccine. We therefore wish to thank all donors and volunteers for their continued support. For  
551 their unstinting generosity and above all, for their hopeful optimism.

552

### 553 **Declaration of Interests**

554 L.S.F., J.N., and K.D. are named as inventors on patent describing the invention and use of coronavirus  
555 vaccines. All other authors have nothing to disclose.

556

557

558

559

560

561

562

## 563 References

- 564 1 [https://www.who.int/who-documents-detail/draft-landscape-of-covid-19-candidate-](https://www.who.int/who-documents-detail/draft-landscape-of-covid-19-candidate-vaccines)  
565 [vaccines.](https://www.who.int/who-documents-detail/draft-landscape-of-covid-19-candidate-vaccines)
- 566 2 Boudewijns, R. *et al.* STAT2 signaling as double-edged sword restricting viral dissemination  
567 but driving severe pneumonia in SARS-CoV-2 infected hamsters. *bioRxiv*,  
568 2020.2004.2023.056838, doi:10.1101/2020.04.23.056838 (2020).
- 569 3 Wang, L. *et al.* Importance of Neutralizing Monoclonal Antibodies Targeting Multiple  
570 Antigenic Sites on the Middle East Respiratory Syndrome Coronavirus Spike Glycoprotein To  
571 Avoid Neutralization Escape. *J Virol* **92**, doi:10.1128/jvi.02002-17 (2018).
- 572 4 Buchholz, U. J. *et al.* Contributions of the structural proteins of severe acute respiratory  
573 syndrome coronavirus to protective immunity. *Proc Natl Acad Sci U S A* **101**, 9804-9809,  
574 doi:10.1073/pnas.0403492101 (2004).
- 575 5 Cao, Y. *et al.* Potent Neutralizing Antibodies against SARS-CoV-2 Identified by High-  
576 Throughput Single-Cell Sequencing of Convalescent Patients' B Cells. *Cell*,  
577 doi:<https://doi.org/10.1016/j.cell.2020.05.025> (2020).
- 578 6 Wrapp, D. *et al.* Structural Basis for Potent Neutralization of Betacoronaviruses by Single-  
579 Domain Camelid Antibodies. *Cell* **181**, 1004-1015.e1015,  
580 doi:<https://doi.org/10.1016/j.cell.2020.04.031> (2020).
- 581 7 Querec, T. D. *et al.* Systems biology approach predicts immunogenicity of the yellow fever  
582 vaccine in humans. *Nat Immunol* **10**, 116-125, doi:10.1038/ni.1688 (2009).
- 583 8 Barrett, A. D. & Teuwen, D. E. Yellow fever vaccine - how does it work and why do rare cases  
584 of serious adverse events take place? *Curr Opin Immunol* **21**, 308-313,  
585 doi:10.1016/j.coi.2009.05.018 (2009).
- 586 9 Draper, S. J. & Heeney, J. L. Viruses as vaccine vectors for infectious diseases and cancer. *Nat*  
587 *Rev Microbiol* **8**, 62-73, doi:10.1038/nrmicro2240 (2010).
- 588 10 Kum, D. B. *et al.* A yellow fever–Zika chimeric virus vaccine candidate protects against Zika  
589 infection and congenital malformations in mice. *npj Vaccines* **3**, 56, doi:10.1038/s41541-018-  
590 0092-2 (2018).
- 591 11 Bonaldo, M. C., Sequeira, P. C. & Galler, R. The yellow fever 17D virus as a platform for new  
592 live attenuated vaccines. *Hum Vaccin Immunother* **10**, 1256-1265, doi:10.4161/hv.28117  
593 (2014).
- 594 12 Dallmeier, K. & Neyts, J. Simple and inexpensive three-step rapid amplification of cDNA 5'  
595 ends using 5' phosphorylated primers. *Anal Biochem* **434**, 1-3, doi:10.1016/j.ab.2012.10.031  
596 (2013).
- 597 13 Kum, D. B. *et al.* Limited evolution of the yellow fever virus 17d in a mouse infection model.  
598 *Emerg Microbes Infect* **8**, 1734-1746, doi:10.1080/22221751.2019.1694394 (2019).
- 599 14 Mishra, N. *et al.* A Chimeric Japanese Encephalitis Vaccine Protects against Lethal Yellow  
600 Fever Virus Infection without Inducing Neutralizing Antibodies. *mBio* **11**,  
601 doi:10.1128/mBio.02494-19 (2020).
- 602 15 Rockx, B. *et al.* Comparative pathogenesis of COVID-19, MERS, and SARS in a nonhuman  
603 primate model. *Science* **368**, 1012-1015, doi:10.1126/science.abb7314 (2020).
- 604 16 van Doremalen, N. *et al.* ChAdOx1 nCoV-19 vaccination prevents SARS-CoV-2 pneumonia in  
605 rhesus macaques. *bioRxiv*, 2020.2005.2013.093195, doi:10.1101/2020.05.13.093195 (2020).
- 606 17 Yu, J. *et al.* DNA vaccine protection against SARS-CoV-2 in rhesus macaques. *Science*,  
607 doi:10.1126/science.abc6284 (2020).
- 608 18 Shi, J. *et al.* Susceptibility of ferrets, cats, dogs, and other domesticated animals to SARS-  
609 coronavirus 2. *Science* **368**, 1016-1020, doi:10.1126/science.abb7015 (2020).
- 610 19 Zhu, N. *et al.* A Novel Coronavirus from Patients with Pneumonia in China, 2019. *New*  
611 *England Journal of Medicine* **382**, 727-733, doi:10.1056/NEJMoa2001017 (2020).

- 612 20 Huang, C. *et al.* Clinical features of patients infected with 2019 novel coronavirus in Wuhan,  
613 China. *The Lancet* **395**, 497-506, doi:10.1016/S0140-6736(20)30183-5 (2020).
- 614 21 Wang, D. *et al.* Clinical Characteristics of 138 Hospitalized Patients With 2019 Novel  
615 Coronavirus–Infected Pneumonia in Wuhan, China. *JAMA* **323**, 1061-1069,  
616 doi:10.1001/jama.2020.1585 (2020).
- 617 22 Prokunina-Olsson, L. *et al.* COVID-19 and emerging viral infections: The case for interferon  
618 lambda. *Journal of Experimental Medicine* **217**, doi:10.1084/jem.20200653 (2020).
- 619 23 Meier, K. C., Gardner, C. L., Khoretchenko, M. V., Klimstra, W. B. & Ryman, K. D. A Mouse  
620 Model for Studying Viscerotropic Disease Caused by Yellow Fever Virus Infection. *PLOS*  
621 *Pathogens* **5**, e1000614, doi:10.1371/journal.ppat.1000614 (2009).
- 622 24 Erickson, A. K. & Pfeiffer, J. K. Dynamic Viral Dissemination in Mice Infected with Yellow Fever  
623 Virus Strain 17D. *Journal of Virology* **87**, 12392-12397, doi:10.1128/jvi.02149-13 (2013).
- 624 25 Watson, A. M., Lam, L. K., Klimstra, W. B. & Ryman, K. D. The 17D-204 Vaccine Strain-Induced  
625 Protection against Virulent Yellow Fever Virus Is Mediated by Humoral Immunity and CD4+  
626 but not CD8+ T Cells. *PLoS Pathog* **12**, e1005786, doi:10.1371/journal.ppat.1005786 (2016).
- 627 26 Channappanavar, R. *et al.* Dysregulated Type I Interferon and Inflammatory Monocyte-  
628 Macrophage Responses Cause Lethal Pneumonia in SARS-CoV-Infected Mice. *Cell Host*  
629 *Microbe* **19**, 181-193, doi:10.1016/j.chom.2016.01.007 (2016).
- 630 27 Channappanavar, R. & Perlman, S. Pathogenic human coronavirus infections: causes and  
631 consequences of cytokine storm and immunopathology. *Semin Immunopathol* **39**, 529-539,  
632 doi:10.1007/s00281-017-0629-x (2017).
- 633 28 Page, C. *et al.* Induction of alternatively activated macrophages enhances pathogenesis  
634 during severe acute respiratory syndrome coronavirus infection. *J Virol* **86**, 13334-13349,  
635 doi:10.1128/jvi.01689-12 (2012).
- 636 29 Grifoni, A. *et al.* Targets of T Cell Responses to SARS-CoV-2 Coronavirus in Humans with  
637 COVID-19 Disease and Unexposed Individuals. *Cell* **181**, 1489-1501.e1415,  
638 doi:10.1016/j.cell.2020.05.015 (2020).
- 639 30 Ni, L. *et al.* Detection of SARS-CoV-2-Specific Humoral and Cellular Immunity in COVID-19  
640 Convalescent Individuals. *Immunity* **52**, 971-977.e973, doi:10.1016/j.immuni.2020.04.023  
641 (2020).
- 642 31 Chan, J. F.-W. *et al.* Simulation of the clinical and pathological manifestations of Coronavirus  
643 Disease 2019 (COVID-19) in golden Syrian hamster model: implications for disease  
644 pathogenesis and transmissibility. *Clinical Infectious Diseases*, doi:10.1093/cid/ciaa325  
645 (2020).
- 646 32 Sia, S. F. *et al.* Pathogenesis and transmission of SARS-CoV-2 in golden hamsters. *Nature*,  
647 doi:10.1038/s41586-020-2342-5 (2020).
- 648 33 Imai, M. *et al.* Syrian hamsters as a small animal model for SARS-CoV-2 infection and  
649 countermeasure development. *Proceedings of the National Academy of Sciences*, 202009799,  
650 doi:10.1073/pnas.2009799117 (2020).
- 651 34 Gao, Q. *et al.* Development of an inactivated vaccine candidate for SARS-CoV-2. *Science* **369**,  
652 77-81, doi:10.1126/science.abc1932 (2020).
- 653 35 Liu, L. *et al.* Anti-spike IgG causes severe acute lung injury by skewing macrophage responses  
654 during acute SARS-CoV infection. *JCI Insight* **4**, doi:10.1172/jci.insight.123158 (2019).
- 655 36 Smatti, M. K., Al Thani, A. A. & Yassine, H. M. Viral-Induced Enhanced Disease Illness. *Front*  
656 *Microbiol* **9**, 2991-2991, doi:10.3389/fmicb.2018.02991 (2018).
- 657 37 Lindenbach, B. & Rice, C. M. Trans-Complementation of yellow fever virus NS1 reveals a role  
658 in early RNA replication. *Journal of virology* **71**, 9608-9617, doi:10.1128/JVI.71.12.9608-  
659 9617.1997 (1998).
- 660 38 Buchholz, U. J., Finke, S. & Conzelmann, K. K. Generation of bovine respiratory syncytial virus  
661 (BRSV) from cDNA: BRSV NS2 is not essential for virus replication in tissue culture, and the

- 662 human RSV leader region acts as a functional BRSV genome promoter. *J Virol* **73**, 251-259  
663 (1999).
- 664 39 Sharma, S. *et al.* Small-molecule inhibitors of TBK1 serve as an adjuvant for a plasmid-  
665 launched live-attenuated yellow fever vaccine. *Hum Vaccin Immunother*, 1-8,  
666 doi:10.1080/21645515.2020.1765621 (2020).
- 667 40 Bredenbeek, P. J. *et al.* A recombinant Yellow Fever 17D vaccine expressing Lassa virus  
668 glycoproteins. *Virology* **345**, 299-304, doi:10.1016/j.virol.2005.12.001 (2006).
- 669 41 Müller, U. *et al.* Functional role of type I and type II interferons in antiviral defense. *Science*  
670 **264**, 1918-1921, doi:10.1126/science.8009221 (1994).
- 671 42 van den Broek, M. F., Müller, U., Huang, S., Zinkernagel, R. M. & Aguet, M. Immune defence  
672 in mice lacking type I and/or type II interferon receptors. *Immunol Rev* **148**, 5-18,  
673 doi:10.1111/j.1600-065x.1995.tb00090.x (1995).
- 674 43 Livak, K. J. & Schmittgen, T. D. Analysis of relative gene expression data using real-time  
675 quantitative PCR and the 2(-Delta Delta C(T)) Method. *Methods* **25**, 402-408,  
676 doi:10.1006/meth.2001.1262 (2001).
- 677 44 Reed, L. J. & Muench, H. A SIMPLE METHOD OF ESTIMATING FIFTY PER CENT ENDPOINTS12.  
678 *American Journal of Epidemiology* **27**, 493-497, doi:10.1093/oxfordjournals.aje.a118408  
679 (1938).
- 680 45 Vandeghinste, B. *et al.* Iterative CT Reconstruction Using Shearlet-Based Regularization.  
681 *Nuclear Science, IEEE Transactions on* **60**, 121, doi:10.1117/12.911057 (2012).
- 682 46 Vande Velde, G. *et al.* Longitudinal micro-CT provides biomarkers of lung disease that can be  
683 used to assess the effect of therapy in preclinical mouse models, and reveal compensatory  
684 changes in lung volume. *Dis Model Mech* **9**, 91-98, doi:10.1242/dmm.020321 (2016).
- 685 47 Berghen, N. *et al.* Radiosafe micro-computed tomography for longitudinal evaluation of  
686 murine disease models. *Sci Rep* **9**, 17598, doi:10.1038/s41598-019-53876-x (2019).
- 687 48 Kaptein, S. J. *et al.* Antiviral treatment of SARS-CoV-2-infected hamsters reveals a weak effect  
688 of favipiravir and a complete lack of effect for hydroxychloroquine. *bioRxiv*,  
689 2020.2006.2019.159053, doi:10.1101/2020.06.19.159053 (2020).
- 690 49 Geisinger, J. M., Turan, S., Hernandez, S., Spector, L. P. & Calos, M. P. In vivo blunt-end  
691 cloning through CRISPR/Cas9-facilitated non-homologous end-joining. *Nucleic Acids Res* **44**,  
692 e76, doi:10.1093/nar/gkv1542 (2016).
- 693 50 Whitt, M. A. Generation of VSV pseudotypes using recombinant ΔG-VSV for studies on virus  
694 entry, identification of entry inhibitors, and immune responses to vaccines. *J Virol Methods*  
695 **169**, 365-374, doi:10.1016/j.jviromet.2010.08.006 (2010).
- 696 51 Berger Rentsch, M. & Zimmer, G. A vesicular stomatitis virus replicon-based bioassay for the  
697 rapid and sensitive determination of multi-species type I interferon. *PLoS One* **6**, e25858,  
698 doi:10.1371/journal.pone.0025858 (2011).
- 699 52 Hoffmann, M. *et al.* SARS-CoV-2 Cell Entry Depends on ACE2 and TMPRSS2 and Is Blocked by  
700 a Clinically Proven Protease Inhibitor. *Cell* **181**, 271-280.e278, doi:10.1016/j.cell.2020.02.052  
701 (2020).
- 702 53 Fukushi, S. *et al.* Vesicular stomatitis virus pseudotyped with severe acute respiratory  
703 syndrome coronavirus spike protein. *Journal of General Virology* **86**, 2269-2274,  
704 doi:<https://doi.org/10.1099/vir.0.80955-0> (2005).
- 705 54 Wang, C. *et al.* Publisher Correction: A human monoclonal antibody blocking SARS-CoV-2  
706 infection. *Nat Commun* **11**, 2511, doi:10.1038/s41467-020-16452-w (2020).
- 707 55 Kleine-Weber, H. *et al.* Mutations in the Spike Protein of Middle East Respiratory Syndrome  
708 Coronavirus Transmitted in Korea Increase Resistance to Antibody-Mediated Neutralization. *J*  
709 *Virol* **93**, doi:10.1128/jvi.01381-18 (2019).

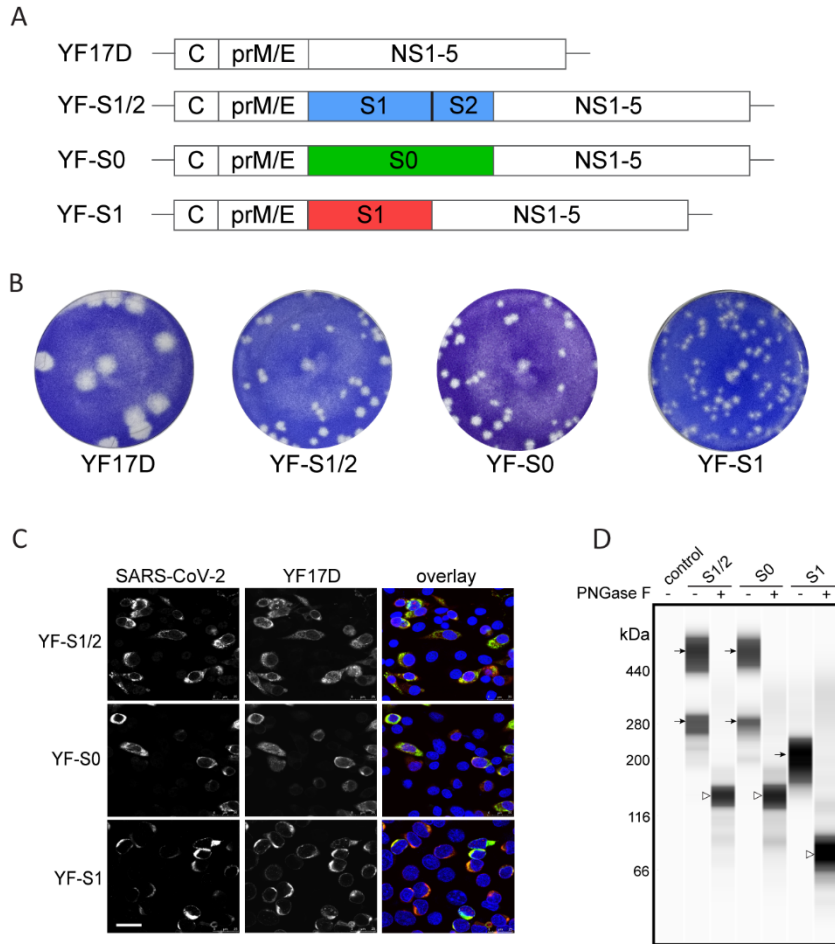

710

711 **Fig. 1. Vaccine design and antigenicity.** (A) Schematic representation of YF17D-based SARS-CoV-2  
 712 vaccine candidates (YF-S). YF-S1/2 expresses the native cleavable post-fusion form of the S protein  
 713 (S1/2), YF-S0 the non-cleavable pre-fusion conformation (S0), and YF-S1 the N-terminal (receptor  
 714 binding domain) containing S1 subunit of the S protein. For molecular details in vaccine design see  
 715 Methods section. (B) Representative pictures of plaque phenotypes from different YF-S vaccine  
 716 constructs on BHK-21 cells in comparison to YF17D. (C) Confocal immunofluorescent images of BHK-  
 717 21 cells three days post-infection with different YF-S vaccine constructs staining for SARS-CoV-2  
 718 Spike antigen (green) and YF17D (red) (nuclei stained with DAPI, blue; white scalebar: 25  $\mu$ m). (D)  
 719 Immunoblot analysis of SARS-CoV-2 Spike (S1/2, S0 and S1) antigen and SARS Spike expression after  
 720 transduction of BHK-21 cells with different YF-S vaccine candidates. Prior to analysis, cell lysates were  
 721 treated with PNGase F to remove their glycosylation or left untreated (black arrows – glycosylated forms  
 722 of S; white arrows – de-glycosylated forms).

723

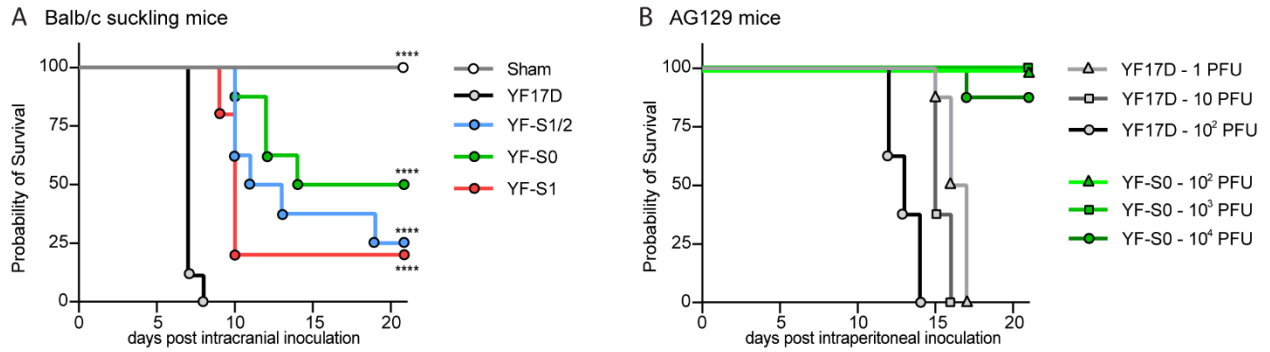

724

725 **Fig. 2. Attenuation of YF-S vaccine candidates. (A)** Survival curve of suckling Balb/c mice (up to 21  
726 days) after intracranial (i.c.) inoculation with 100 PFU of vaccine candidates YF-S1/2 (n=8, blue), YF-  
727 S0 (n=8, green), YF-S1 (n=8, red) in comparison to sham (n=10, grey) or YF17D (n=9, black). **(B)**  
728 Survival curve of AG129 mice (up to 21 days) after intraperitoneal (i.p.) inoculation with a dose range  
729 of YF-S0 ( $10^2$ ,  $10^3$  and  $10^4$  PFU; green) in comparison to YF17D (1, 10 and  $10^2$  PFU black and grey).  
730 Statistical significance between groups was calculated by the Log-rank Mantel-Cox test (\*\*\*\*  $P <$   
731 0.0001).

732

A Vaccination and challenge schedule

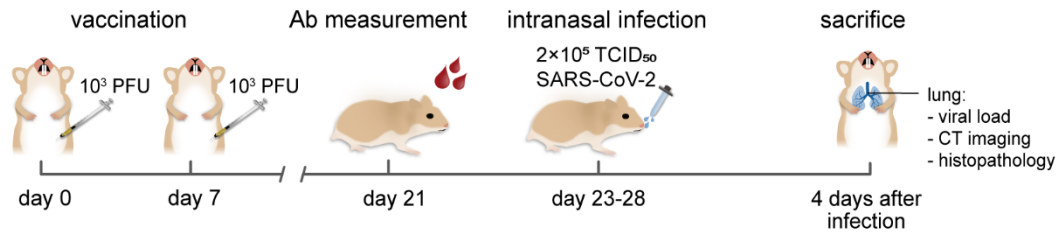

B nAb titers

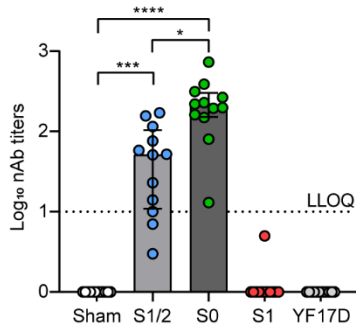

C bAb titers

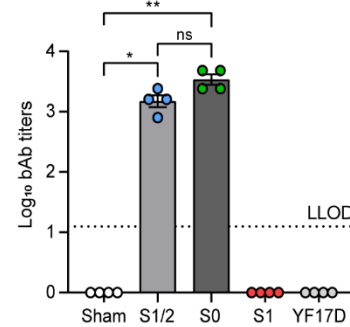

D Seroconversion rates

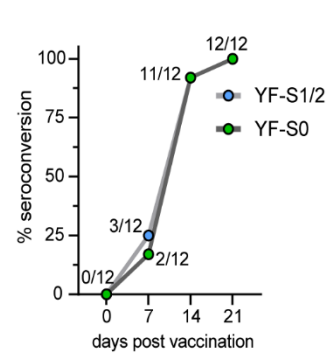

E Viral RNA in lungs

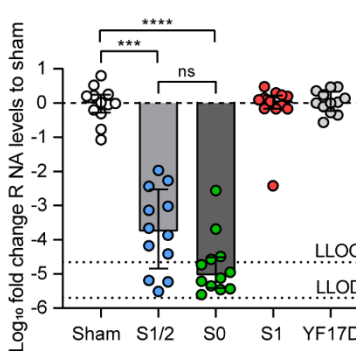

F Infectious virus in lungs

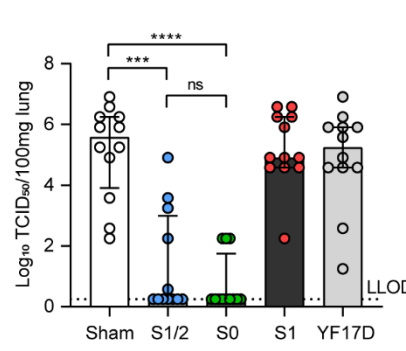

G nAb titers pre/post challenge

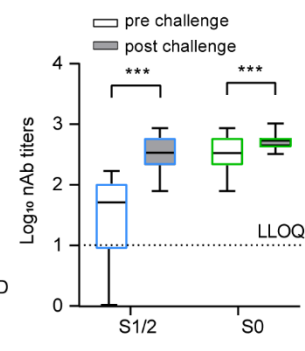

733

734 **Fig. 3. Immunogenicity and protective efficacy of YF-S vaccine candidates in hamsters. (A)**  
 735 **Schematic representation of vaccination and challenge schedule.** Syrian hamsters were immunized  
 736 twice i.p. at day 0 and 7 with 10<sup>3</sup> PFU each of vaccine constructs YF-S1/2 (blue, n=12), YF-S0 (green,  
 737 n=12), YF-S1 (red, n=12), sham (white, n=12) or YF17D (grey, n=12) (two independent experiments).  
 738 Subsequently, animals were intranasally inoculated with 2 × 10<sup>5</sup> TCID<sub>50</sub> of SARS-CoV-2 and followed  
 739 up for four days. **(B-D) Humoral immune responses.** Neutralizing antibodies (nAb) **(B)** and total  
 740 binding IgG (bAb) **(C)** in hamsters vaccinated with different vaccine candidates (sera collected at day  
 741 21 post-vaccination in both experiments; minipools of sera of three animals each were analyzed for  
 742 quantification of bAb). **(D)** Seroconversion rates at indicated days post-vaccination with YF-S1/2 and  
 743 YF-S0 (number of animals with detectable bAbs at each time point are referenced). **(E, F) Protection**  
 744 **from SARS-CoV-2 infection.** Viral loads in lungs of hamsters four days after intranasal infection were  
 745 quantified by RT-qPCR **(E)** and virus titration **(F)**. Viral RNA levels were determined in the lungs,  
 746 normalized against β-actin and fold-changes were calculated using the 2<sup>(-ΔΔC<sub>q</sub>)</sup> method compared to the  
 747 median of sham-vaccinated hamsters. Infectious viral loads in the lungs are expressed as number of  
 748 infectious virus particles per 100 mg of lung tissue. **(G) Anamnestic response.** Comparison of the levels  
 749 of nAbs prior and four days after challenge. For a pairwise comparison of responses in individual  
 750 animals see Supplementary Figure S4C and D. Dotted line indicating lower limit of quantification  
 751 (LLOQ) or lower limit of detection (LLOD) as indicated. Data shown are medians ± IQR. Statistical

752 significance between groups was calculated by the non-parametric ANOVA, Kruskal-Wallis with  
 753 uncorrected Dunn's test (B-F), or a non-parametric two-tailed Wilcoxon matched-pairs rank test (G) (ns  
 754 = Non-Significant,  $P > 0.05$ , \*  $P < 0.05$ , \*\*  $P < 0.01$ , \*\*\*  $P < 0.001$ , \*\*\*\*  $P < 0.0001$ ).

755

756

757

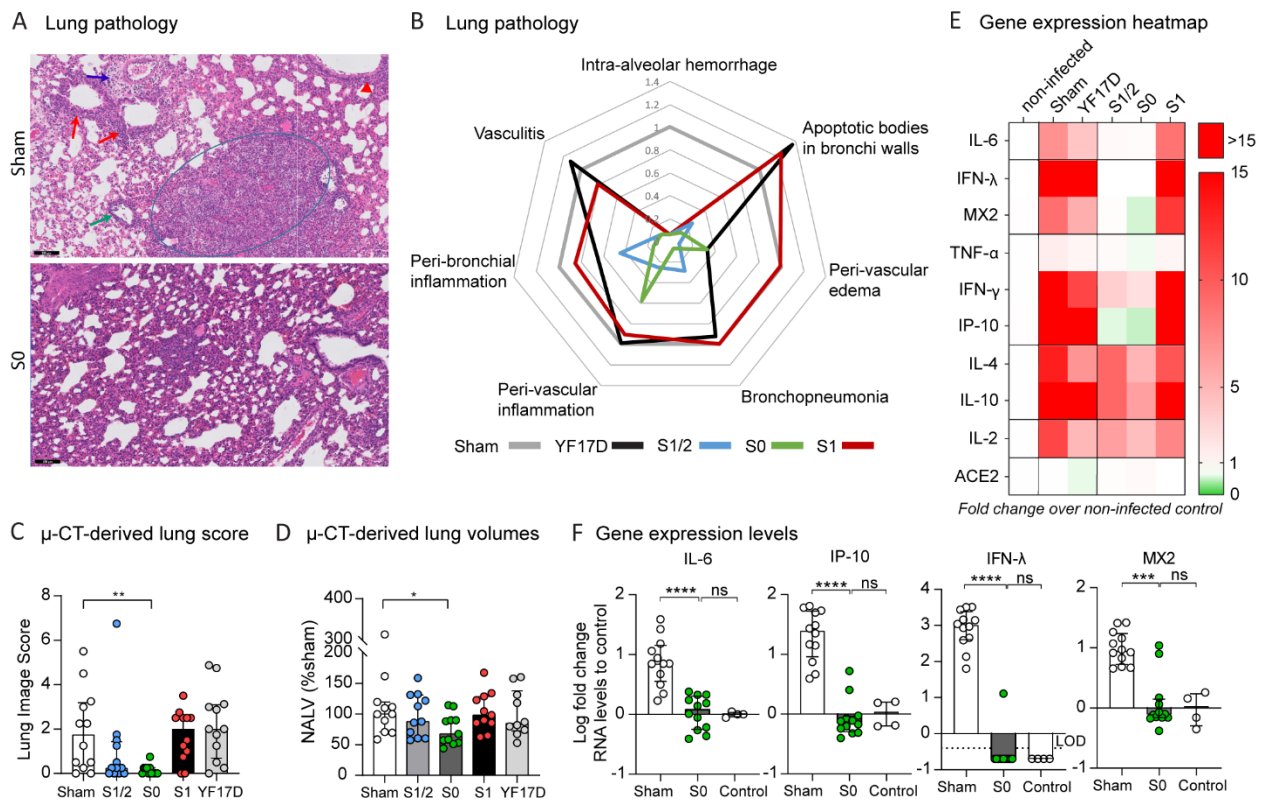

758

759 **Fig. 4. Protection from lung disease in YF-S vaccinated hamsters. (A) Representative H&E images**  
 760 **of the lungs of a diseased (sham-vaccinated and infected) and a YF-S0-vaccinated and challenged**  
 761 **hamster. Peri-vascular edema (blue arrow); peri-bronchial inflammation (red arrows); peri-vascular**  
 762 **inflammation (green arrow); bronchopneumonia (circle), apoptotic body in bronchial wall (red**  
 763 **arrowhead). (B) A spider-web plot showing histopathological score for signs of lung damage (peri-**  
 764 **vascular edema, bronchopneumonia, peri-vascular inflammation, peri-bronchial inflammation,**  
 765 **vasculitis, intra-alveolar hemorrhage and apoptotic bodies in bronchus walls) normalized to sham (grey).**  
 766 **Black scalebar: 100 μm (C-D) Micro-CT-derived analysis of lung disease. Five transverse cross**  
 767 **sections at different positions in the lung were selected for each animal and scored to quantify lung**  
 768 **consolidations (C) or used to quantify the non-aerated lung volume (NALV) (D), as functional**  
 769 **biomarker reflecting lung consolidation. (E) Heat-map showing differential expression of selected**  
 770 **antiviral, pro-inflammatory and cytokine genes in lungs of sham- or YF-S-vaccinated hamsters after**  
 771 **SARS-CoV-2 challenge four days p.i. (n=12 per treatment group) relative to non-treated non-infected**  
 772 **controls (n=4) (scale represents fold-change over controls). RNA levels were determined by RT-qPCR**  
 773 **on lung extracts, normalized for β-actin mRNA levels and fold-changes over the median of uninfected**  
 774 **controls were calculated using the  $2^{-(\Delta\Delta Cq)}$  method. (F) Individual expression profiles of mRNA levels**  
 775 **of IL-6, IP-10, IFN-λ and MX2, with data presented as median ± IQR relative to the median of non-**  
 776 **treated non-infected controls. For IFN-λ, where all control animals had undetectable RNA levels, fold-**  
 777 **changes were calculated over the lowest detectable value (LLOD – lower limit of detection; dotted line).**



778 Statistical significance between conditions was calculated by the non-parametric ANOVA, Kruskal-  
 779 Wallis with uncorrected Dunn's test (ns = Not-Significant,  $P > 0.05$ , \*  $P < 0.05$ , \*\*  $P < 0.01$ , \*\*\*  $P <$   
 780  $0.001$ ).

781

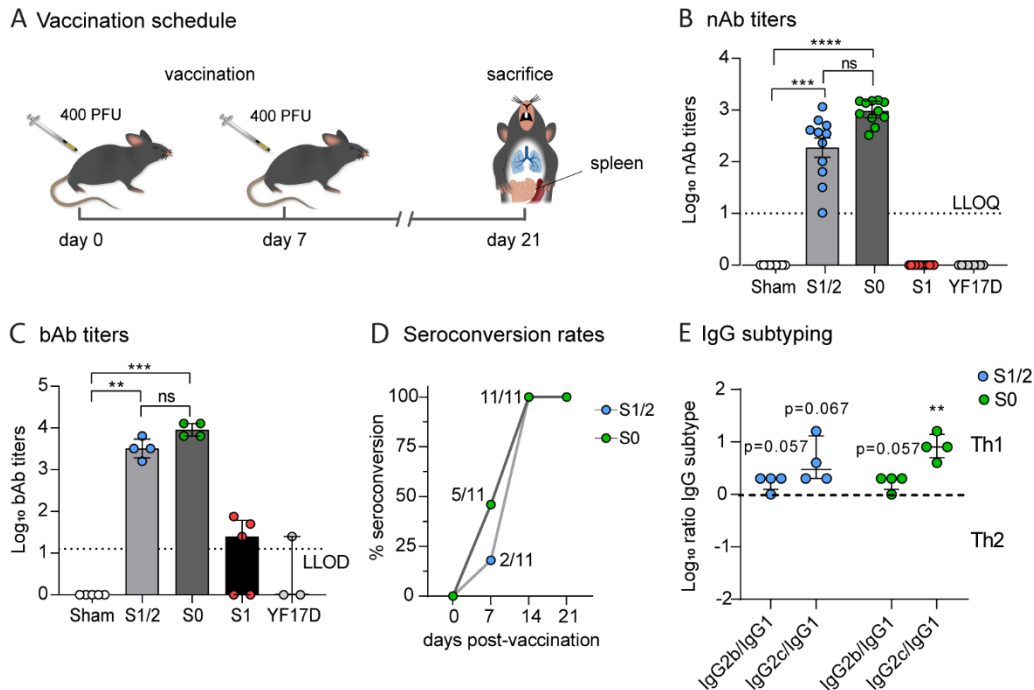

782

783 **Fig. 5. Humoral immune response elicited by YF-S vaccine candidates in mice. (A) Schematic**  
 784 **presentation of immunization and challenge schedule.** *Ifnar*<sup>-/-</sup> mice were vaccinated twice i.p. with  
 785 400 PFU each at day 0 and 7 in five groups: constructs YF-S1/2 (blue, n=11), YF-S0 (green, n=11), YF-  
 786 S1 (red, n=13), sham (white, n=9) or YF17D (grey, n=9). **(B, C) SARS-CoV-2 specific antibody levels.**  
 787 Titers of nAbs **(B)** and bAbs **(C)** at day 21 post-vaccination. **(D) Seroconversion rates.** Rates at  
 788 indicated days post-vaccination with YF-S1/2 and YF-S0 (number of animals with detectable bAbs at  
 789 each time point are referenced). For quantification of bAbs, minipools of sera of two to three animals  
 790 each were analyzed. Dotted lines indicate lower limit of quantification (LLOQ) or lower limit of  
 791 detection (LLOD). **(E) IgG for YF-S1/2 (blue) and YF-S0 (green).** Ratios of IgG2b or IgG2c over  
 792 IgG1 (determined for minipools of two to three animals each) plotted and compared to a theoretical limit  
 793 between Th1 and Th2 response (dotted line indicates IgG2b/c over IgG1 ratio of 1). Data shown are  
 794 medians ± IQR from three independent vaccination experiments (n > 9 for each condition). Statistical  
 795 significance between groups was calculated by a non-parametric ANOVA, Kruskal-Wallis with  
 796 uncorrected Dunn's test (B-C) or parametric One-Sample T-test (D) (ns = Not-Significant,  $P > 0.05$ , \*  $P$   
 797  $< 0.05$ , \*\*  $P < 0.01$ , \*\*\*  $P < 0.001$ , \*\*\*\*  $P < 0.0001$ ).

798

799

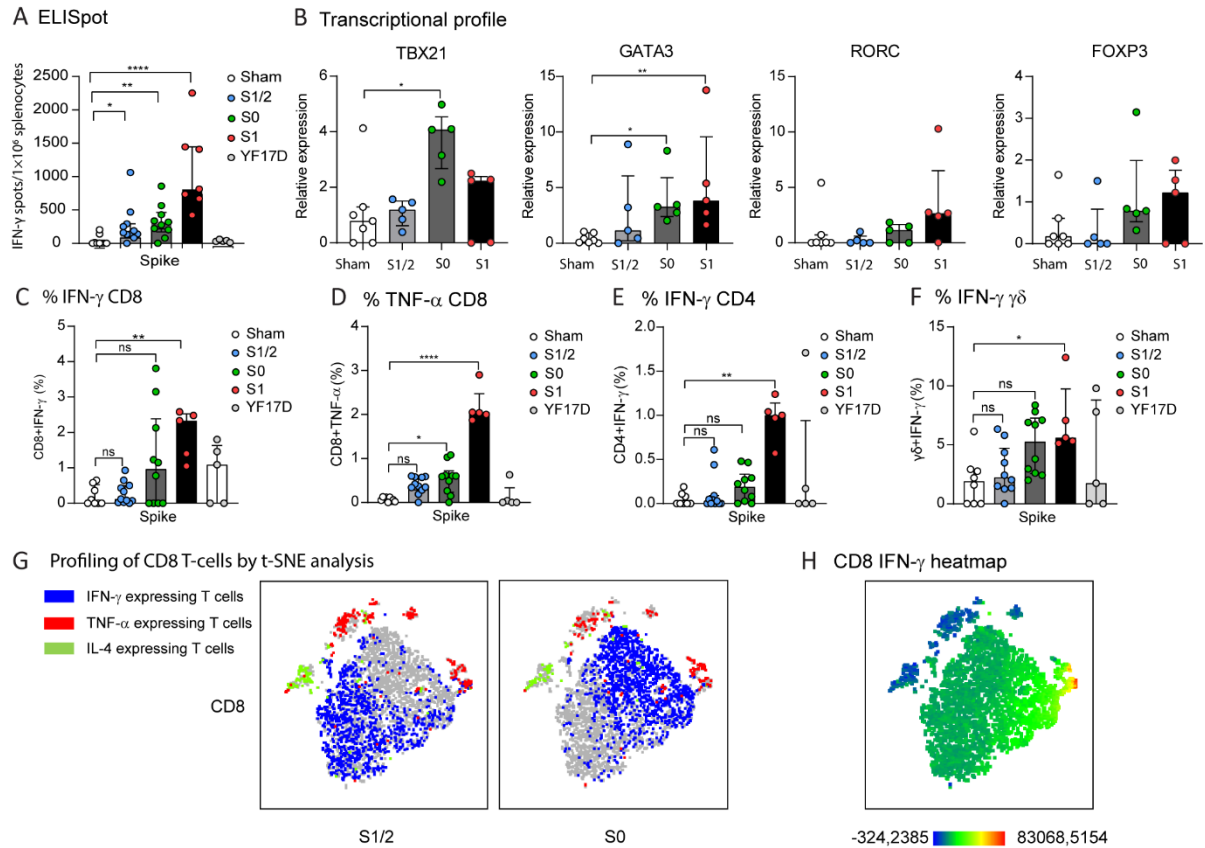

800

801 **Fig. 6. Cell-mediated immune (CMI) responses of YF-S vaccine candidates in mice.** Spike-specific  
 802 T-cell responses were analyzed by ELISpot and intracellular cytokine staining (ICS) of splenocytes  
 803 isolated from *ifnar*<sup>-/-</sup> mice 21 days post-prime (*i.e.*, two weeks post-boost) immunization with YF-S1/2  
 804 (blue), YF-S0 (green), YF-S1 (red) in comparison to sham (white) or YF17D (grey). **(A) Quantitative**  
 805 **assessment of SARS-CoV-2 specific CMI response by ELISpot.** Spot counts for IFN- $\gamma$ -secreting cells  
 806 per 10<sup>6</sup> splenocytes after stimulation with SARS-CoV-2 Spike peptide pool. **(B) Transcriptional**  
 807 **profile induced by YF-S vaccination.** mRNA expression levels of transcription factors (TBX21,  
 808 GATA3, RORC, FOXP3) determined by RT-qPCR analysis of Spike peptide-stimulated splenocytes  
 809 ( $n=5-7$  per condition). Data were normalized for GAPDH mRNA levels and fold-changes over median  
 810 of uninfected controls were calculated using the  $2^{(-\Delta\Delta C_q)}$  method. **(C-F)** Percentage of IFN- $\gamma$  **(C)** and  
 811 TNF- $\alpha$  **(D)** expressing CD8, and IFN- $\gamma$  expressing CD4 **(E)** and  $\gamma/\delta$  **(F)** T-cells after stimulation with  
 812 SARS-CoV-2 Spike peptide pool. All values normalized by subtracting spots/percentage of positive  
 813 cells in corresponding unstimulated control samples. Data shown are medians  $\pm$  IQR. Statistical  
 814 significance between groups was calculated by the non-parametric ANOVA, Kruskal-Wallis with  
 815 uncorrected Dunn's test (ns = Not-Significant,  $P > 0.05$ , \*  $P < 0.05$ , \*\*  $P < 0.01$ , \*\*\*  $P < 0.001$ ). **(G, H)**  
 816 **Profiling of CD8 T-cells from YF-S1/2 and YF-S0 vaccinated mice by t-SNE analysis.** t-distributed  
 817 Stochastic Neighbor Embedding (t-SNE) analysis of spike-specific CD8 T-cells positive for at least one  
 818 intracellular marker (IFN- $\gamma$ , TNF- $\alpha$ , IL-4) from splenocytes of *ifnar*<sup>-/-</sup> mice immunized with YF-S1/2 or  
 819 YF-S0 ( $n=6$  per group) after overnight stimulation with SARS-CoV-2 Spike peptide pool. Blue dots  
 820 indicate IFN- $\gamma$  expressing T-cells, red dots TNF- $\alpha$  expressing T-cells, and green dots IL-4 expressing  
 821 CD8 T-cells. **(H) Heatmap** of IFN- $\gamma$  expression density of spike-specific CD8 T-cells from YF-S1/2  
 822 and YF-S0 vaccinated mice. Scale bar represents IFN- $\gamma$  expressing density (blue – low expression, red  
 823 – high expression) (see Figure S8 for full analysis).

824

825

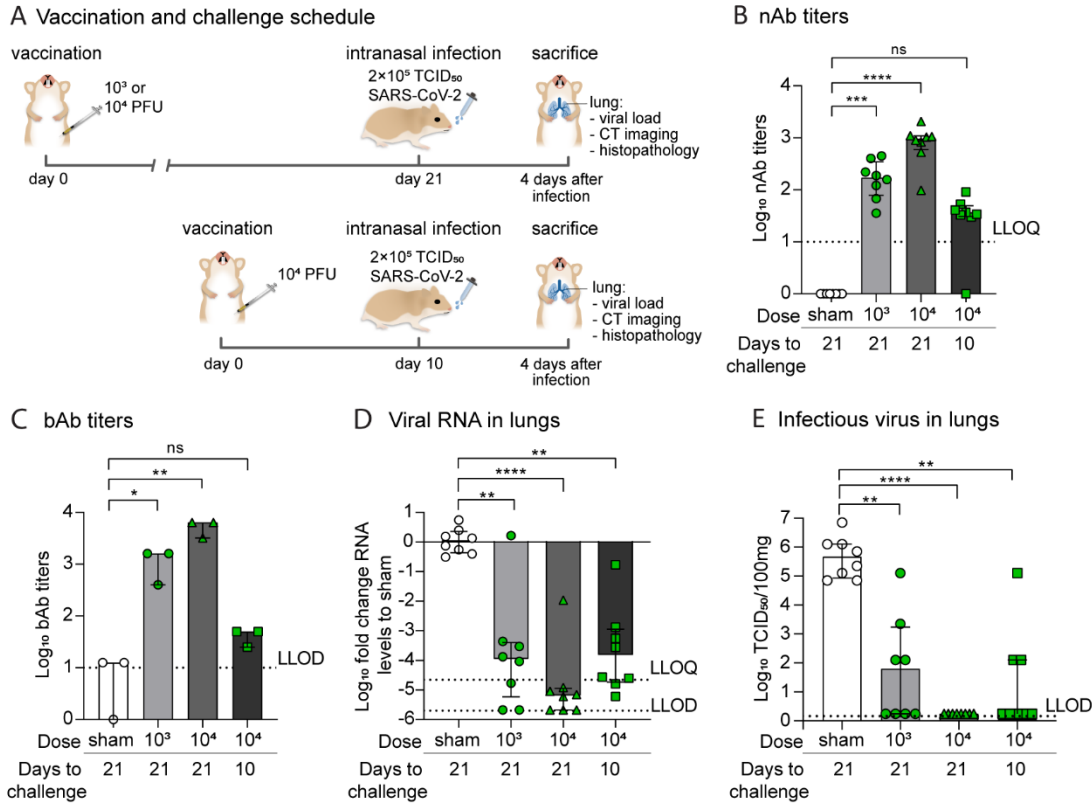

826

827 **Fig. 7. Single shot vaccination in hamsters using the YF-S0 lead vaccine candidate. (A) Schematic**  
 828 **presentation of experiment.** Three groups of hamsters were vaccinated only once i.p. with sham (white;  
 829  $n=8$ ) or YF-S0 at two different doses;  $1 \times 10^3$  PFU (low, green circles;  $n=8$ ) and  $10^4$  PFU (high, green  
 830 triangles;  $n=8$ ) of YF-S0 at 21 days prior to challenge. A fourth group was vaccinated with the high  $10^4$   
 831 PFU dose of YF-S0 at 10 days prior to challenge (green squares;  $n=8$ ). **(B-C) Humoral immune**  
 832 **responses following single dose vaccination.** Titers of nAb **(B)** and bAb **(C)** in sera collected from  
 833 vaccinated hamsters immediately prior to challenge (minipools of sera of two to three animals analyzed  
 834 for quantification of bAb). **(D, E) Protection from SARS-CoV-2 infection.** Protection from challenge  
 835 with SARS-CoV-2 after vaccination with YF-S0 in comparison to sham vaccinated animals, as  
 836 described for two-dose vaccination schedule (Figure 3 and Figure S5); log<sub>10</sub>-fold change relative to sham  
 837 vaccinated in viral RNA levels **(D)** and infectious virus loads **(E)** in the lung of vaccinated hamsters at  
 838 day four p.i. as determined by RT-qPCR and virus titration, respectively. Dotted line indicating lower  
 839 limit of quantification (LLOQ) or lower limit of detection (LLOD) as indicated. Data shown are medians  
 840  $\pm$  IQR. Statistical significance between groups was calculated by the non-parametric ANOVA, Kruskal-  
 841 Wallis with uncorrected Dunn's test (ns = Non-Significant,  $P > 0.05$ , \*  $P < 0.05$ , \*\*  $P < 0.01$ , \*\*\*\*  $P <$   
 842  $0.0001$ ).

843

844

845
